# Supplementary material
Source: PubMed Central journal article supplement (PMC2573470)
Supplement: NIHMS36210-supplement-01.pdf [file NIHMS36210-supplement-01.pdf]

**Supplementary Table 1. Primer Sequences**Primer name Sequence (5' > 3')*Gata4 genotyping*

G4Rec2 TCCATGAGACCCCAGAGTGTGCCTGAG  
 G4Rec4 ACCCTGGAAGACCCCCAATCTCGG  
 G4Rec5 TGTCATTCTTCGCTGGAGCCGC

*Y chromosome marker*

SRY1 TGGTGAGCATAACCATAACC  
 SRY2 TTGCTGTCTTTGTGCTAGCC

*GATA4 sequencing primers*

GATA4\_01F1 GTAAAACGACGGCCAGTGTAGCACTTGGGCATTTTCC  
 GATA4\_01R1 CAGGAAACAGCTATGACCGTAGCGCACGTCTCTTTTCC  
 GATA4\_02F1 GTAAAACGACGGCCAGTACGCCTGGACAAAACAAAGG  
 GATA4\_02R1 CAGGAAACAGCTATGACCCGGCAACAACGATAATATGC  
 GATA4\_03F1 GTAAAACGACGGCCAGTAAATTGGGATTTTCCGGAGT  
 GATA4\_03R1 CAGGAAACAGCTATGACCGTCCCCGGGAAGGAGAAG  
 GATA4\_03nF1 GTAAAACGACGGCCAGTTTCCCCTTTGATTTTTGATCTTCG  
 GATA4\_03nR1 CAGGAAACAGCTATGACCTAAGCGGCTCCGTCGGCT  
 GATA4\_04F1 GTAAAACGACGGCCAGTGGCCTGTCTACCTCCAG  
 GATA4\_04R1 CAGGAAACAGCTATGACCTCGAGGTAGTGAAGCACCATC  
 GATA4\_04nF1 GTAAAACGACGGCCAGGCCAGCCAGCAGGGCAGC  
 GATA4\_04nR1 CAGGAAACAGCTATGACCCCTCGACAGGGCTCAAGAC  
 GATA4\_05F1 GTAAAACGACGGCCAGTGGGCTGAAGTCAGAGTGAGG  
 GATA4\_05R1 CAGGAAACAGCTATGACCGATGCACACCCTCAAGTTCC  
 GATA4\_06F1 GTAAAACGACGGCCAGTGAGTTAGGTGCCGTCACAGG  
 GATA4\_06R1 CAGGAAACAGCTATGACCGCCAGCAAAGTAGTTGAAAGC  
 GATA4\_07F1 GTAAAACGACGGCCAGTGCTTAGGTGTTGCCTTCTCG  
 GATA4\_07R1 CAGGAAACAGCTATGACCGATGTCCGATGCTGTCACC  
 GATA4\_07nF1 GTAAAACGACGGCCAGGCAGCAGGTGTGTGTCTTTC  
 GATA4\_07nR1 CAGGAAACAGCTATGACCGGGCTGGCCTGCCTAA  
 GATA4\_08F1 GTAAAACGACGGCCAGTGTAGCCCTCCGCAGATAAGG  
 GATA4\_08R1 CAGGAAACAGCTATGACCGAGGGTAGCTCACTGCTTGC  
 GATA4\_09F1 GTAAAACGACGGCCAGTCCCTTCATGCCTAGATCACC  
 GATA4\_09R1 CAGGAAACAGCTATGACCGTCCCATCAGCGTGTAAAGG  
 GATA4\_10F1 GTAAAACGACGGCCAGTCTCTGCCTGGTAATGACTCC  
 GATA4\_10R1 CAGGAAACAGCTATGACCTGGAAGTGAAGGAGCAAAGG  
 GATA4\_11F1 GTAAAACGACGGCCAGTGCCTTAACCCACCACAGC  
 GATA4\_11R1 CAGGAAACAGCTATGACCTGTTGTGTTTGTGTTGCTTCG  
 GATA4\_12F1 GTAAAACGACGGCCAGTTCTGTCTGCTCCTCCTAGCC  
 GATA4\_12R1 CAGGAAACAGCTATGACCTGAACCTCCCAGTGAAGACC  
 GATA4\_13F1 GTAAAACGACGGCCAGTCTGCACATTGCTGTTTCTGC  
 GATA4\_13R1 CAGGAAACAGCTATGACCGGGATGAGTGTGCTTTTTCG
