# Supplementary material
Source: PubMed Central journal article supplement (PMC2573470)
Supplement: NIHMS36210-supplement-02.pdf [file NIHMS36210-supplement-02.pdf]

**Supplementary Table 2. Non-synonymous *GATA4* Sequence Variants Found in Controls Only, or in CHD Patients and Controls**

| Nucleotide Change | Amino Acid Change | Affected       | Controls <sup>A</sup> |                             |                |
|-------------------|-------------------|----------------|-----------------------|-----------------------------|----------------|
|                   |                   |                | This Study            | Schluterman et al. [10]     | Total          |
| 1129A>G           | S377G             | 63/474 (0.133) | 20/184 (0.109)        | 23/318 (0.072)              | 43/502 (0.086) |
| 1138G>A           | V380M             | 2/474 (0.004)  | 0/184 (0)             | 3/318 (0.009)               | 3/502 (0.086)  |
| 1180C>A           | P394T             | 1/474 (0.002)  | 0/38 (0) <sup>B</sup> | 12/384 (0.031) <sup>B</sup> | 12/422 (0.028) |

<sup>A</sup>Control sequence data used in this study contained previously unreported control data (“this study”) and control data previously reported [10]. Sequence variants found only in the study of Schluterman and colleagues but not in this study were not included in this table.

<sup>B</sup>Frequency in SE Asians. The proband was also SE Asian. This variant was not found in other ethnicities studied.
